1 **Novel subgroups of type 2 diabetes based on multi-Omics profiling: an IMI-**  
2 **RHAPSODY Study**

3  
4 Shiyong Li<sup>1</sup>, Iulian Dragan<sup>4</sup>, Chun Ho Fung<sup>2</sup>, Dmitry Kuznetsov<sup>4</sup>,  
5 Michael K. Hansen<sup>12</sup>, Joline W.J. Beulens<sup>5,6</sup>, Leen M. 't Hart<sup>5,6,7,8</sup>,  
6 Roderick C. Slieker<sup>7</sup>, Louise A. Donnelly<sup>9</sup>, Mathias J. Gerl<sup>10</sup>, Christian Klose<sup>10</sup>, Florence  
7 Mehl<sup>4</sup>, Kai Simons<sup>10</sup>, Petra JM Elders<sup>11</sup>, Ewan R. Pearson<sup>9</sup>,  
8 Guy A. Rutter<sup>1,2,3\*</sup> and Mark Ibberson<sup>4\*</sup>

9  
10 <sup>1</sup>Centre de Recherche du CHUM, and Faculty of Medicine, University of Montreal, QC,  
11 Canada

12 <sup>2</sup>Section of Cell Biology and Functional Genomics, Department of Metabolism, Diabetes  
13 and Reproduction, Imperial College of London, du Cane Road, London W120NN, United  
14 Kingdom

15 <sup>3</sup>Lee Kong Chian School of Medicine, Nan Yang Technological University, Singapore.

16 <sup>4</sup>Vital-IT Group, SIB Swiss Institute of Bioinformatics, Lausanne, Switzerland

17 <sup>5</sup>Department of Epidemiology and Data Sciences, Amsterdam University Medical Center,  
18 location VUmc, Amsterdam, The Netherlands

19 <sup>6</sup>Amsterdam Public Health, Amsterdam, The Netherlands

20 <sup>7</sup>Department of Cell and Chemical Biology, Leiden University Medical Center, Leiden,  
21 The Netherlands

22 <sup>8</sup>Department of Biomedical Data Sciences, Section Molecular Epidemiology, Leiden  
23 University Medical Center, Leiden, The Netherlands

24 <sup>9</sup>Division of Population Health & Genomics, School of Medicine, University of Dundee, UK

25 <sup>10</sup>Lipotype GmbH Dresden Germany

26 <sup>11</sup>Department of General Practice and Elderly Care Medicine, Amsterdam Public Health  
27 Research Institute, Amsterdam UMC–location VUmc, Amsterdam, the Netherlands

28 <sup>12</sup>Janssen Research and Development, Philadelphia, PA

29  
30 Address correspondence to

31 Guy A. Rutter [guy.rutter@umontreal.ca](mailto:guy.rutter@umontreal.ca), 514 890-8000, ext. 27081

32 Mark Ibberson [mark.ibberson@sib.swiss](mailto:mark.ibberson@sib.swiss), (41) 21 692 4084

33  
34 Word count: 3823 Number of Figures: 3 Number of Tables: 1

35

36

37 **Abstract**

38 Type 2 diabetes is a complex, multifactorial disease with varying presentation and  
39 underlying pathophysiology. Recent studies using data-driven cluster analysis have led  
40 to a stratification of type 2 diabetes into novel subgroups based on six clinical  
41 measurements. Whether these subgroups truly correspond to the underlying  
42 phenotypic differences is nevertheless unclear. Here, we apply an unsupervised, data-  
43 driven clustering method (Similarity Network Fusion) to characterize type 2 diabetes in  
44 two independent cohorts involving 1,134 subjects in total based on integrated plasma  
45 lipidomics and peptidomics data without pre-selection. Logistic regression was then  
46 used to explore clustering based on  $\geq 180$  circulating lipids and 1,195 protein  
47 biomarkers, alongside clinical signatures. Two subgroups were identified, one of which  
48 associated with elevated C-peptide levels, diabetic complications and more severe  
49 insulin resistance compared to the other. GWAS analysis against 403 type 2 diabetes  
50 risk variants revealed associations of several SNPs with clusters and altered molecular  
51 profiles. We thus demonstrate that heterogeneity in type 2 diabetes can be captured by  
52 circulating omics alone using an unsupervised bottom-up approach. Such multi-omics  
53 signatures could reflect pathological mechanisms underlying type 2 diabetes and thus  
54 may help inform on precision medicine approaches to disease management.

55

56 **Introduction**

57 Type 2 diabetes is global problem of increasing proportions and a substantial threat to  
58 human health (1). Recently, Ahlqvist et al. (2) proposed an approach to sub-classifying  
59 patients with type 2 diabetes into four different subgroups by *K-means* clustering using  
60 six clinical measurements: age at diagnosis, Body Mass Index (BMI), Glutamic acid

61 decarboxylase (GAD) autoantibodies (GADA), HOMA2-B (beta-cell function), HOMA2-IR  
62 (insulin resistance) and HbA1c. Since then, we (3) and others (4,5) have applied a  
63 similar clustering method with independent cohorts and obtained similar results. These  
64 studies suggest the new classification system facilitates meaningful sample subgroup  
65 discovery across different populations. However, the value of this stratification  
66 approach has been questioned by some researchers (6,7) in terms of its stability and  
67 utility. Importantly, it is still debatable whether type 2 diabetes patients with different  
68 underlying aetiologies are represented faithfully, by placing them into subsets, based  
69 solely on a limited number of clinical features. Indeed, others (8) have proposed that  
70 positioning individuals within a multi-dimensional, and potentially fluid, continuum of  
71 variables may provide a more useful prognostic strategy.

72

73 An alternative clustering approach, Similarity Network Fusion (SNF) (9) combines  
74 multiple levels of data from the same patients into a similarity network, enabling  
75 exploratory multidimensional data-driven clustering. First, patient similarity networks  
76 are generated for each data level independently then merged into a single global  
77 network through an iterative process. Clustering can then be performed on this network  
78 using a graph-based algorithm. As opposed to clustering patients based on a limited  
79 number of pre-selected clinical features, this unsupervised bottom-up approach can  
80 leverage much larger biological data sets (“omics”), and holds the promise of  
81 uncovering new insights, which may be missed by models based on single data types,  
82 limited clinical features or supervised approaches.

83

84 In the present study, we performed distributed analysis of two independent patient  
85 cohorts to explore the stratification of type 2 diabetes based on combined plasma

86 lipidomics and peptidomics using a federated database system. In addition, we explore  
87 the genetic factors predisposing to membership in these groups and the potential  
88 correlations with patient molecular profiles.

89

## 90 **Methods**

### 91 **Study populations**

92 We used data from two type 2 diabetes cohorts: Hoorn Diabetes Care System (DCS) and  
93 Genetics of Diabetes Audit and Research in Tayside Scotland (GoDARTS) .

94 The DCS cohort recruits almost all type 2 diabetes patients from 103 GPs in the West-  
95 Friesland region of the Netherlands. This prospective, regional cohort study started in  
96 1998 and by the time of 2017, it holds 12,673 type 2 diabetes patients with a median of  
97 0.7 years (IQR 0.2-3.7) after diagnosis (10).

98

99 Between 1996 and 2015, GoDARTS recruited 10149 type 2 diabetes patients from the  
100 Tayside region of Scotland. Patients in the GoDARTS cohort were not necessarily  
101 recruited at the time of diagnosis (11).

102

103 Lipidomics and peptidomics are available for a subset of type 2 diabetes patients in  
104 both DCS and GoDARTS cohorts. These data were generated as part of the IMI2  
105 RHAPSODY project (3). The sample availability for omics was within 2 years of  
106 diagnosis. Of note, individuals were selected without taking into consideration pre-  
107 cluster assignments.

108

109

110

## 111 **Measurements**

112 Data from both cohorts were used with informed consent obtained through the relevant  
113 local ethical committees. In DCS, all blood measurements are performed in fasted  
114 individuals. In contrast, all measurements in GoDARTS are performed in the non-fasted  
115 state. In DCS, Haemoglobin A1c was measured based on the turbidimetric inhibition  
116 immunoassay for haemolysed whole EDTA blood (Cobas c501, Roche Diagnostics,  
117 Mannheim, Germany). The levels of triglycerides, total cholesterol and HDL cholesterol  
118 were measured enzymatically (Cobas c501, Roche Diagnostics) (10). In DCS and  
119 GoDARTS, C-peptide was measured on a DiaSorin Liaison (DiaSorin, Saluggia, Italy).  
120 Plasma lipids were determined using a QExactive mass spectrometer (Thermo  
121 Scientific). Plasma protein levels were measured on the SomaLogic SOMAscan platform  
122 (Boulder, Colorado, USA). For more details refer to (3).

123

## 124 **Cluster analysis**

125 A federated database of type 2 diabetes cohorts including DCS and GoDARTS has  
126 previously been set up as part of the RHAPSODY project. This system enables statistical  
127 and machine learning analysis to be performed on cohort data at a distance without any  
128 disclosure of sensitive data. The federated database system was interrogated using the  
129 R statistical programming language (version 4.0.4). In both DCS and GoDARTS cohorts,  
130 patients with complete lipidomics and peptidomics (589 and 545 patients, DCS and  
131 GoDARTS, respectively) were used for clustering and subsequent statistical analysis.  
132 Lipidomics and peptidomics values were centered to a mean value of 0 and an SD of 1 in  
133 each cohort using the *scale* function in R. Euclidean distances between each pair of  
134 patients were then calculated based on the normalized lipidomics or peptidomics data  
135 by using *dist2* function from *dssSNF* (*dsSwissKnifeClient* package) (12). Patient similarity

136 matrices were generated from the Euclidean distance matrices with parameters of K  
137 (the number of nearest neighbours) equal to 20 and hyperparameter alpha equal to 5.  
138 The patient similarity matrices for lipidomics and peptidomics were then fused using  
139 the *SNF* function within *SNFtool* package (13) with T (number of iterations) equal to 20.  
140 In both DCS and GoDARTS, men and women were clustered together without pre-  
141 separation. Two-step clustering was then performed, in which the optimal number of  
142 clusters is estimated in the first step using the silhouette method and patient  
143 assignments made in the second step. Silhouette widths of fused cluster patients were  
144 calculated from the similarity matrices using the *Silhouette\_SimilarityMatrix* function  
145 (*CancerSubtypes* package) (14).

146

147 SNF models were validated by bootstrapping tests (n=1000 iterations) that compared  
148 model classification to models using randomized Euclidean distance matrices. Euclidean  
149 distance matrices were randomized using the function *randomizeMatrix* within the  
150 *picante* package (15). For each simulated model, the same parameters were used and  
151 the number of clusters is set to correspond to the number of clusters in the study model.  
152 The significance of each cluster (P-value  $\leq 0.05$ ) was calculated by assessing the  
153 frequency of achieving a model with an equal or greater mean local cluster coefficient  
154 for randomized data. Local cluster coefficient calculation was done with unweighted,  
155 undirected adjacency matrices using the *transitivity* function in the *igraph* package (16).  
156 The adjacency matrices were generated from the similarity matrices with the top 5%  
157 similarity values set as 1 and the rest as 0.

158

159 The possibility of using clinical measurements to replicate our multi-omics clustering  
160 results was assessed in a logistic regression model with pseudo R square as the

161 recorded results. One of the common interpretations of pseudo R square is the  
162 indication of the improvement to which the model parameters improve upon the  
163 prediction of the null model. In a logistic regression model, we treated the patient's  
164 assignment results as the dependent variable (cluster 1:1; cluster 2:0) with six clinical  
165 measurements: age, BMI, C-peptide, LDL cholesterol, HDL cholesterol, Triglycerides act  
166 as univariate or together as covariates. Pseudo R square=1-(deviation/ null deviation).

167

### 168 **Statistical analysis**

169 Logistic regression modelling was performed by using the *ds.glm* function within the  
170 *dsBaseClient* package to assess the association level of each molecule (lipidomics and  
171 peptidomics), clinical measurements and type 2 diabetes SNPs (17) with the multi-  
172 omics clusters. The cluster classification was treated as a dependent categorical variable  
173 with age, gender and BMI acting as covariates. Subsequently, for lipids, peptides and  
174 clinical measurements, each cluster was subset for the strongly associated (P-value  
175  $\leq 0.05$ ) features and the mean values of each group of features in each cluster were  
176 calculated. Mean values were used since, to protect the patient's identity, individual-  
177 level data cannot be downloaded from the federated database system. However, it is  
178 possible to display a mean value if it is derived from 5 or more patients. Several mean  
179 values for each feature from 5 or more patients were calculated based on the default  
180 patients' order in the remote server for each cluster. The feature values were  
181 normalized. Hierarchical clustering was then performed, and the results were visualized  
182 as heatmaps using the R package *gplots* (18).

183

184 For each patient in the database, the clinical cluster assignments were defined  
185 previously, similar to (2), but with five clinical variables: age, BMI, HbA1c, high-density

186 lipoprotein (HDL) and C-peptide (3). Our clusters were compared with these clinical  
187 clusters by calculating the hypergeometric overlap p-value (*phyper* function in R).

188

189 Cox regression was performed using the *dssCoxph* function in the *dssSwissKnifeClient*  
190 package. Time to insulin requirement was defined as the length of time from diagnosis  
191 until an individual started insulin treatment for a period of more than six months, or  
192 alternatively as more than two independent HbA1c measurements greater than 69  
193 mmol/mol (8.5%) at least three months apart and when  $\geq 2$  non-insulin glucose-  
194 lowering drugs were taken. Hazard ratios for time to insulin treatment requirement  
195 within the clusters were calculated using Cox regression with age, gender and BMI as  
196 covariates.

197

198 The associations between type 2 diabetes SNPs (17) and multi-omics clusters or  
199 molecules with altered expression profiles were assessed using a linear regression  
200 model with age, BMI and gender as co-independent variables. The routinely used  
201 genome-wide common variant association threshold  $p \leq 5 \times 10^{-8}$  was applied in  
202 this study (19) to assess significance.

203

204 All analyses were performed using the R statistical programming language (version  
205 4.0.4). The Benjamini-Hochberg procedure was used to determine the false discovery  
206 rate correcting for multiple tests. Figures were produced using *gplots* (version 3.1.1),  
207 *ggplot2* (version 3.3.4) and *igraph* (version 1.2.6). Figure 1a was generated using  
208 *Biorender*.

209

210



211 **Data availability statement**

212 Information about accessing the Rhapsody federated database can be found at:

213 <https://imi-rhapsody.eu/>. Summary statistics of lipidomic and proteomic data will be

214 available from an interactive Shiny dashboard, available upon publication.

215

216 **Results**

217 **Unsupervised multi-Omics clustering defines two subgroups in independent**

218 **cohorts**

219 Similarity Network Fusion (SNF) was performed using plasma lipidomics and

220 peptidomics data from a total of 1022 type 2 diabetes patients in two independent

221 cohorts. 589 and 545 type 2 diabetes patients, respectively, from the DCS and GoDARTS

222 cohorts with complete cases of plasma lipidomics and peptidomics measurements were

223 selected. The characteristics of these two cohorts were generally comparable in terms

224 of average age and BMI, with a majority of males (3). Individuals were clustered using

225 SNF as described in Methods. Through silhouette analysis, we were able to demonstrate

226 that clustering integrating both lipidomics and peptidomics outperforms either of the

227 single -omics in terms of cluster assignment quality (Supplemental Figure 1). Based on a

228 two-step clustering procedure, the optimal number of clusters was found to be two

229 (Supplemental Figure 1). The significance of the clustering results was validated by

230 bootstrapping (n=1000 iterations) against simulated datasets (Supplemental Figure 2).

231 In the DCS cohort, cluster 1 comprised 46.5% of the patients and was characterized by a

232 relatively high BMI value compared to cluster 2 (53.5%). In both GoDARTS (cluster

233 1:40.7%; cluster 2:59.3%) and DCS cohorts, patients have similar age, HbA1c values.

234 Furthermore, in the DCS cohort, triglycerides, C-peptide and homeostatic model

235 assessment (HOMA) 2, HOMA2-B and HOMA2-IR, which were calculated based on

236 fasting blood glucose and fasting C-peptide concentration, showed a higher  
237 concentration in cluster 1 compared to cluster 2. In contrast, LDL cholesterol, HDL  
238 cholesterol and HOMA2-S show a higher concentration in cluster 2 (Supplemental  
239 Figure 3). Similarly, a higher concentration of LDL cholesterol and HDL cholesterol, and  
240 a lower concentration of triglycerides and C-peptide, were also observed in cluster 2  
241 compared to cluster 1 in the GoDARTS cohort (Figure 2a; Supplemental Figure 3).

242 We compared type 2 diabetes progression rates between clusters in both cohorts using  
243 Cox Proportional hazard models. In both cohorts, type 2 diabetes progression rate  
244 showed a nominally significant difference in DCS and GoDARTS, respectively, between  
245 multi-omics cluster 1 and cluster 2 ( $p=0.0156$  (unadjusted), DCS;  $p=0.0308$   
246 (unadjusted), GoDARTS; corrected for gender). Cluster 2 reduces the hazard ratio by  
247 44% or 27% in DCS or GoDARTS, respectively (Figure 2d, left). Results were in the same  
248 direction but were less significant when additionally correcting for age and BMI (figure  
249 2d, right).

250 We then investigated whether the multi-omics clusters could be replicated by using  
251 clinical measurements alone. Pseudo R square was used to assess the possibility of  
252 using six clinical features: age, BMI, LDL cholesterol, HDL cholesterol, C-peptide and  
253 triglycerides to predict the multi-omics clustering results in a logistic model for both  
254 cohorts (Supplemental Table 1). The highest pseudo  $R^2$  scores are shown when all  
255 seven clinical measurements act as covariates with 29.9% and 46.9% improvement  
256 over random in DCS and GoDARTS, respectively. These results clearly indicate that the  
257 molecular clusters we observe are not merely reflecting differences in routine clinical  
258 measurements.

259 In summary, by combining plasma lipidomics and peptidomics data in a data-driven and  
260 unsupervised analysis, we were able to separate type 2 diabetes patients from two

261 independent cohorts into two subgroups that appear to differ in diabetes-related  
262 clinical characteristics.

263

### 264 **Similar molecular signatures separate subgroups in both cohorts**

265 We investigated the correlation of each plasma lipidomics or peptidomics feature with  
266 the clustering results using logistic regression models adjusting for gender, BMI and  
267 age. In DCS, out of a total of 1195 different peptides and 180 different lipids that were  
268 used for clustering, 123 proteins and 137 lipids showed significant differences between  
269 clusters. In GoDARTS, out of a total of 1195 different peptides and 199 different lipids  
270 that were used for clustering, 130 proteins and 149 lipids showed significant  
271 differences between clusters. 50 significant common peptides and 109 significant  
272 common lipids are shared between the DCS and GoDARTS cohorts (Figure 2b).

273

274 A hierarchical clustering of the relative concentration patterns of the cluster-  
275 associated features is shown as a heatmap in DCS and GoDARTS (Figure 2b;  
276 Supplemental Figure 5). In DCS, a number of discriminative omics features were  
277 observed when comparing clusters. Phosphatidylcholine, Triacylglycerol, Diacylglycerol  
278 and Ceramide were relatively higher in cluster 1; Phosphatidylcholine O and  
279 Sphingomyelin were relatively higher in cluster 2. These pronounced expression  
280 patterns were also apparent in GoDARTS. For proteins, the difference in the molecular  
281 profiles between cluster 1 and 2 can be observed in both cohorts, but the differences  
282 were more modest compared to lipids.

283

284

285 **GWAS analysis reveals putative associations between type 2 diabetes molecular**  
286 **profiles and genetic factors**

287 Finally, in order to investigate possible genetic differences between molecular clusters,  
288 we analysed genetic loci previously associated with type 2 diabetes (17). Multi-omics  
289 clusters in each cohort were compared with type 2 diabetes SNPs using logistic  
290 regression correcting for age, BMI and gender. We did not detect any significant  
291 associations of the type 2 diabetes variants with our clusters in either cohort.

292 Since we had identified around 110 proteins and 130 lipids that showed altered levels  
293 between clusters, we then tested the association between the altered molecular profiles  
294 and type 2 diabetes variants. The SNP and molecular profile association was assessed in  
295 a linear regression model with SNP dosages, age, BMI and gender as independent  
296 variables. In DCS, a novel protective type 2 diabetes variant (17), rs146886108, showed  
297 putative association with several molecules such as heat shock protein 90 beta ( $p$   
298 =1.08e-13) and glucose 6 phosphate isomerase ( $p = 2.04e-15$ ). A consistent association  
299 result between rs505922 and E-selection can also be observed in both DCS ( $p = 1.23e-$   
300 15) and GoDARTS ( $p = 1.40e-16$ ) cohorts.

301

302 **Multi-Omics clusters show similarity to known clinical subgroups**

303 We next compared the multi-omics clusters with clusters based on clinical  
304 measurements (3). Similar to a previous study (2), these clusters can be classified as  
305 severe insulin-deficient diabetes (SIDD); severe insulin-resistant diabetes (SIRD); mild  
306 obesity-related diabetes (MOD); mild diabetes (MD) and mild diabetes with high HDL  
307 (MDH). The overlap of clinical clusters with molecular clusters is shown in figure 3a. In  
308 DCS, multi-omics cluster 1 showed a significant overlap with clinical cluster SIRD and  
309 MOD. On the other hand, multi-omics cluster 2 showed a significant overlap with clinical

310 cluster MDH. In GoDARTS, a similar trend was observed, as multi-omics cluster 1  
311 showed a larger overlap with SIRD and MOD, and multi-omics cluster 2 showed an  
312 overlap with MDH (figure 3a).

313 Box plots were used to further visualize the differences between multi-omics and  
314 clinical clusters (figure 3b, Supplemental figure 4). In DCS, we observed that multi-  
315 omics cluster 1, SIRD and MOD showed similar levels of C-peptide, HOMA-2B, HOMA-  
316 2IR, and triglycerides levels. On the other hand, multi-omics cluster 2 and MDH both  
317 showed a low C-peptide and a high HDL cholesterol level (Supplemental figure 4a). A  
318 similar pattern was observed in GoDARTS (Supplemental figure 4b).

319 In summary, we conclude that multi-omics cluster 1 shares similar clinical features to  
320 SIRD and MOD clinical subgroups whereas multi-omics cluster 2 shows higher  
321 similarity to the MDH clinical subgroup.

322

## 323 **Discussion**

324 Using an unsupervised, bottom-up approach, we were able to cluster individuals with  
325 diabetes from two large European cohorts into two robust clusters based solely on  
326 plasma-measured multi-omics data. Clinical features such as age and BMI were  
327 excluded as confounding variables driving SNF clustering as they were not significantly  
328 different between cluster 1 and cluster 2. Moreover, using six clinical features to  
329 replicate the multi-omics clustering results was unsuccessful for both cohorts. These  
330 findings suggest that patient stratification using molecular features can reveal novel  
331 insights that are complementary to clinical data.

332 In both the DCS and GoDARTS cohorts, patients assigned to multi-omics clusters 1 and  
333 2 showed conserved differences in disease severity markers as measured by HOMA2-B,  
334 -IR, C-peptide and triglyceride levels, which is known to be associated with insulin

335 resistance (20). Individuals with type 2 diabetes are at risk of many complications such  
336 as kidney disease and cardiovascular disease. It has been demonstrated that insulin  
337 resistance is associated with hallmarks of kidney damage such as glomerular  
338 hypertension, hyperfiltration and proteinuria (21, 22). We show evidence from Cox  
339 proportional hazards modelling that patients in different clusters have slower disease  
340 progression rates in both cohorts. Therefore, these multi-omics clusters could  
341 potentially define molecular signatures related to disease severity, progression and  
342 complications risk which could be relevant for more precision-based therapy of type 2  
343 diabetes.

344 We tested the associations of type 2 diabetes genetic loci with multi-omics clusters  
345 but found no clear evidence to suggest that the multi-omics clusters were associated  
346 with specific type 2 diabetes genetic variants in either cohort. This suggests that known  
347 type 2 diabetes genes are not drivers of molecular differences between clusters. A  
348 similar clustering result can be observed in both cohorts and cluster 1 and cluster 2  
349 show similar HbA1c levels suggesting that our clusters are stable and at least partially  
350 mechanistically distinct. It would be intriguing to see whether similar results can be  
351 obtained from both newly diagnosed patients and long-term diabetes patients could be  
352 performed in the future to support this view.

353 In both cohorts, we have identified ~100 proteins and ~130 lipids that showed an  
354 altered expression pattern between multi-omics cluster 1 and cluster 2. Currently, we  
355 cannot fully identify which molecules likely to be the driver molecules, nor we can say  
356 these molecules play an important role in type 2 diabetes development. Nevertheless,  
357 we assessed the association between these molecules and the type 2 diabetes variants.  
358 A novel type 2 diabetes SNP, rs146886108, a missense variant that encodes  
359 p.Arg187Gln in ANKH, which was first identified by Mahajan et al. (17), and showed a

360 strong correlation with several measured proteins, including heat shock protein 90  
361 beta, glucose 6 phosphate isomerase. The UK Biobank Mendelian trait GWAS study also  
362 showed a strong association between rs146886108 and random glucose. The fact that  
363 we found a strong association between rs146886108 and glucose 6 phosphate  
364 isomerase could potentially identify a mechanism behind the action of rs146886108 on  
365 glucose regulation. Further investigations may help to evaluate the causal roles of these  
366 type 2 diabetes variants, with their associated molecules and possible mechanisms.

367 Using five clinical measurements, age, BMI, HbA1c, c-peptide and HDL, Slieker and  
368 Donnelly et al. (3) have shown that people with type 2 diabetes could be grouped into  
369 five distinct clusters: insulin-deficient (SIDD), insulin-resistant (SIRD), an obesity  
370 cluster (MOD), mild diabetes (MD) and MD with a high HDL (MDH). Comparing with  
371 these clinical clusters, we were able to demonstrate that the multi-omics clusters  
372 significantly overlap with the clinically defined clusters. Multi-omics cluster 1,  
373 characterized by a relatively high C-peptide and triglycerides level, showed a significant  
374 overlap with SIRD and MOD. Multi-omics cluster 2, a cluster with a relatively high HDL  
375 and low C-peptide value, showed a significant overlap with MDH. These results further  
376 underline the complementarity of the multi-omics and clinical clustering approaches  
377 and suggests that multi-omics signatures can in theory be linked to clinical  
378 measurements and outcomes to explore molecular mechanisms linked to the underlying  
379 heterogeneity of disease.

380 The present approach offers the prospect of multi-omics personalized medicine, in  
381 which an extended set of molecular characteristics is used to assess disease  
382 development and progression. Through multi-omics health management, each patient  
383 might be positioned with respect to the underlying dysregulated pathways, with  
384 therapies selected accordingly. Whether this approach will indeed provide better

385 outcomes than current practice, based on clinical features and more limited blood  
386 biochemistry, will need to be assessed in the future.

387

### 388 **Limitations of study**

389 From the patient network (Figure 1) it is clear that the multi-omics clusters are not  
390 completely distinct. The two clusters therefore represent different molecular  
391 signatures, where a patient shows more similarity to one cluster compared to the other  
392 on a continuous scale. Nevertheless, we do not recommend using such clusters to assign  
393 patients, but rather the use of the clustering results to explore the underlying molecular  
394 pathology and as an alternative route to identifying novel biomarkers for risk of type 2  
395 diabetes and its complications.

396 In both DCS and GoDARTS, patients were not necessarily recruited after diagnosis, and  
397 this heterogeneity in the disease duration could potentially have an effect on the blood  
398 measurements obtained. Moreover, as we mentioned above, in DCS, blood samples are  
399 taken in a fasted state, in contrast to GoDARTS, where blood measurements are done in  
400 a non-fasted state. However, it has been demonstrated that a normal food intake only  
401 has slight effects on cholesterol levels, and lipid profiles at most change minimally in  
402 response to normal food intake in general populations (23, 24).

403 One of the common questions regarding patients' clustering results is whether patients  
404 move between clusters over time. In a recent 5-year follow-up study (25), 367 diabetes  
405 patients were assigned based on the nearest centroid approaches at both baseline and  
406 5-year follow-up. 23% of patients switched their cluster allocations after 5 years. This  
407 can be expected as the variables that were used for clustering such as age, BMI and  
408 HOMA2 can change over time, following the time increase, lifestyle choice changes and  
409 disease progress. For our study, roughly 1375 plasma molecules were used for



410 clustering. Some molecule concentrations such as triacylglycerol and diacylglycerol can  
411 change following lifestyle changes or medical treatment. Other “housekeeping”  
412 molecules are more likely to remain constant over time. The stability of molecular  
413 clustering results needs to be assessed in further prospective studies.

414 We cannot at this stage assert that the different clusters represent different aetiologies  
415 of type 2 diabetes, nor that the clustering method represents an optimal classification  
416 for type 2 diabetes subgroups. The multi-omics clusters in our study were derived  
417 primarily from patients from Europe. Consequently, the applicability of these results to  
418 other ethnic groups needs to be assessed.

419

#### 420 **Acknowledgments**

421 The authors acknowledge the support of the Health Informatics Centre, University of  
422 Dundee, for managing and supplying the anonymized data.

423 **Funding.** G.R. was supported by a Wellcome Trust Investigator Award  
424 (212625/Z/18/Z), MRC Programme grant (MR/R022259/1) Diabetes UK  
425 (BDA/15/0005275, BDA 16/0005485) grants and a start-up grant from the CR-CHUM,  
426 Université de Montréal. This project has received funding from the Innovative  
427 Medicines Initiative 2 Joint Undertaking, under grant agreement no. 115881  
428 (RHAPSODY). This Joint Undertaking receives support from the European Union’s  
429 Horizon 2020 research and innovation programme and EFPIA. This work is supported  
430 by the Swiss State Secretariat for Education, Research and Innovation (SERI), under  
431 contract no. 16.0097.

432 **Duality of Interest.** G.A.R. has received grant funding from, and is a consultant for, Sun  
433 Pharmaceuticals Inc. K.S. is CEO of Lipotype. K.S. and C.K. are shareholders of Lipotype.  
434 M.J.G. is an employee of Lipotype. M.K.H. is an employee of Janssen Research &

435 Development. All other authors declare that there are no relationships or activities that  
436 might bias, or be perceived to bias, their work.

437 **Contribution Statement.** S.L., M.I. and G.A.R. designed the research. S.L. wrote the  
438 manuscript. S.L. performed all data analysis with technical support from I.D., I.D., D.K.,  
439 and M.I. set up a federated node system for data analysis. R.C.S., L.A.D., M.K.H., J.W.J.B.,  
440 L.M't.H., F.M, P.J.M.E. and E.R.P. were involved in generating the peptidomics data,  
441 generating the clinical cluster assignment results, managing and handling the data in  
442 databases. M.J.G., C.K. and K.S. generated the Lipotype data. The research was designed  
443 partly based on the pre-work results by C.H.F. All authors read and approved the  
444 manuscript and contributed according to the ICMJE criteria ([www.icmje.org/](http://www.icmje.org/)). G.A.R.  
445 and M.I. co-supervised the work. M.I. is the guarantor of this work and, as such, had full  
446 access to all the data in the study and takes responsibility for the integrity of the data  
447 and the accuracy of the data analysis.

448

449 **Table 1. Genetic associations with altered molecular profiles between multi-**  
 450 **omics clusters reaching significance.** The correlations between molecules and SNPs  
 451 were estimated using linear regression models with age, BMI and gender adjustments.  
 452 The commonly accepted threshold  $P \leq 5 \times 10^{-8}$  for genome-wide association studies is  
 453 applied in this present study.

| <b>DCS</b>   |              |            |             |                |                                            |                                               |
|--------------|--------------|------------|-------------|----------------|--------------------------------------------|-----------------------------------------------|
| <b>Locus</b> | <b>rs ID</b> | <b>Chr</b> | <b>Pos</b>  | <b>Alleles</b> | <b>association molecule</b>                | <b>P-value (adjusted by BMI, age and sex)</b> |
| ANKH         | rs146886108  | 5          | 14,751,305  | C/T            | Integrin alpha I<br>beta 1 complex         | 5.88E-10                                      |
| ANKH         | rs146886108  | 5          | 14,751,305  | C/T            | Heat shock<br>protein HSP 90<br>alpha beta | 1.13E-21                                      |
| ANKH         | rs146886108  | 5          | 14,751,305  | C/T            | Heat shock<br>protein HSP 90<br>beta       | 1.08E-13                                      |
| ANKH         | rs146886108  | 5          | 14,751,305  | C/T            | Glucose 6<br>phosphate<br>isomerase        | 2.04E-15                                      |
| ANKH         | rs146886108  | 5          | 14,751,305  | C/T            | Alcohol<br>dehydrogenase<br>NADP           | 4.04E-32                                      |
| ABO          | rs505922     | 9          | 133,273,813 | C/T            | E selectin                                 | 1.23E-15                                      |

|                |              |            |             |                |                             |                                               |
|----------------|--------------|------------|-------------|----------------|-----------------------------|-----------------------------------------------|
| ABO            | rs505922     | 9          | 133,273,813 | C/T            | CD209 antigen               | 2.09E-14                                      |
| <b>GoDARTS</b> |              |            |             |                |                             |                                               |
| <b>Locus</b>   | <b>rs ID</b> | <b>Chr</b> | <b>Pos</b>  | <b>Alleles</b> | <b>association molecule</b> | <b>P-value (adjusted by BMI, age and sex)</b> |
| ABO            | rs505922     | 9          | 133,273,813 | C/T            | E selectin                  | 1.40E-16                                      |

454

455

456

457 **References**

- 458 1. International Diabetes Federation. IDF Diabetes Atlas, 10th edn. Brussels,  
459 Belgium: International Diabetes Federation, 2021.
- 460 2. Ahlqvist E, Storm P, Käräjämäki A, Martinell M, Dorkhan M, Carlsson A, et al.  
461 Novel subgroups of adult-onset diabetes and their association with outcomes: a  
462 data-driven cluster analysis of six variables. *Lancet Diabetes Endocrinol*. 2018  
463 May;6(5):361–9.
- 464 3. Slieker RC, Donnelly LA, Fitipaldi H, Bouland GA, Giordano GN, Åkerlund M, et al.  
465 Distinct Molecular Signatures of Clinical Clusters in People With Type 2 Diabetes:  
466 An IMI-RHAPSODY Study. *Diabetes*. 2021 Nov;70(11):2683–93.
- 467 4. Tanabe H, Saito H, Kudo A, Machii N, Hirai H, Maimaituxun G, et al. Factors  
468 Associated with Risk of Diabetic Complications in Novel Cluster-Based Diabetes  
469 Subgroups: A Japanese Retrospective Cohort Study. *J Clin Med Res [Internet]*.  
470 2020 Jul 2;9(7).
- 471 5. Safai N, Ali A, Rossing P, Ridderstråle M. Stratification of type 2 diabetes based on  
472 routine clinical markers. *Diabetes Res Clin Pract*. 2018 Jul;141:275–83.
- 473 6. Kahkoska AR, Geybels MS, Klein KR, Kreiner FF, Marx N, Nauck MA, et al.  
474 Validation of distinct type 2 diabetes clusters and their association with diabetes  
475 complications in the DEVOTE, LEADER and SUSTAIN-6 cardiovascular outcomes  
476 trials. *Diabetes Obes Metab*. 2020 Sep;22(9):1537–47.
- 477 7. Lugner M, Gudbjörnsdóttir S, Sattar N, Svensson AM, Miftaraj M, Eeg-Olofsson K,  
478 et al. Comparison between data-driven clusters and models based on clinical  
479 features to predict outcomes in type 2 diabetes: nationwide observational study.  
480 *Diabetologia*. 2021 Sep;64(9):1973–81.

- 481 8. McCarthy MI. Painting a new picture of personalised medicine for diabetes.  
482 Diabetologia. 2017 May;60(5):793–9.
- 483 9. Wang B, Mezlini AM, Demir F, Fiume M, Tu Z, Brudno M, et al. Similarity network  
484 fusion for aggregating data types on a genomic scale. Nat Methods. 2014  
485 Mar;11(3):333–7.
- 486 10. van der Heijden AA, Rauh SP, Dekker JM, Beulens JW, Elders P, 't Hart LM, et al.  
487 The Hoorn Diabetes Care System (DCS) cohort. A prospective cohort of persons  
488 with type 2 diabetes treated in primary care in the Netherlands. BMJ Open. 2017  
489 Jun 6;7(5):e015599.
- 490 11. Hébert HL, Shepherd B, Milburn K, Veluchamy A, Meng W, Carr F, et al. Cohort  
491 Profile: Genetics of Diabetes Audit and Research in Tayside Scotland (GoDARTS).  
492 Int J Epidemiol. 2018 Apr 1;47(2):380–1j.
- 493 12. Iulian Dragan (2021). dsSwissKnifeClient: DataSHIELD Tools and Utilities - client  
494 side. R package version 0.2.0
- 495 13. Bo Wang, Aziz Mezlini, Feyyaz Demir, Marc Fiume, Zhuowen Tu, Michael Brudno,  
496 Benjamin Haibe-Kains and Anna Goldenberg (2021). SNFtool: Similarity Network  
497 Fusion. R package version 2.3.1.
- 498 14. Xu T, Le TD, Liu L, Su N, Wang R, Sun B, et al. CancerSubtypes: an R/Bioconductor  
499 package for molecular cancer subtype identification, validation and visualization.  
500 Bioinformatics. 2017 Oct 1;33(19):3131–3.
- 501 15. Kembel SW, Cowan PD, Helmus MR, Cornwell WK, Morlon H, Ackerly DD, et al.  
502 Picante: R tools for integrating phylogenies and ecology. Bioinformatics. 2010  
503 Jun 1;26(11):1463–4.

- 504 16. Csardi G, Nepusz T: The igraph software package for complex network research,  
505 InterJournal, Complex Systems 1695. 2006.
- 506 17. Mahajan A, Taliun D, Thurner M, Robertson NR, Torres JM, Rayner NW, et al.  
507 Fine-mapping type 2 diabetes loci to single-variant resolution using high-density  
508 imputation and islet-specific epigenome maps. *Nat Genet.* 2018 Nov;50(11):1505  
509 –13.
- 510 18. Gregory R. Warnes, Ben Bolker, Lodewijk Bonebakker, Robert Gentleman,  
511 Wolfgang Huber, Andy Liaw, Thomas Lumley, Martin Maechler, Arni Magnusson,  
512 Steffen Moeller, Marc Schwartz and Bill Venables (2020). *gplots: Various R*  
513 *Programming Tools for Plotting Data.* R package version 3.1.1.
- 514 19. Panagiotou OA, Ioannidis JPA, Genome-Wide Significance Project. What should  
515 the genome-wide significance threshold be? Empirical replication of borderline  
516 genetic associations. *Int J Epidemiol.* 2012 Feb;41(1):273–86.
- 517 20. Glueck CJ, Khan NA, Umar M, Uppal MS, Ahmed W, Morrison JA, et al. Insulin  
518 resistance and triglycerides. *J Investig Med.* 2009 Dec;57(8):874–81.
- 519 21. Groop L, Ekstrand A, Forsblom C, Widén E, Groop PH, Teppo AM, et al. Insulin  
520 resistance, hypertension and microalbuminuria in patients with type 2 (non-  
521 insulin-dependent) diabetes mellitus. *Diabetologia.* 1993 Jul;36(7):642–7.
- 522 22. Gnudi L, Coward RJM, Long DA. Diabetic Nephropathy: Perspective on Novel  
523 Molecular Mechanisms. *Trends Endocrinol Metab.* 2016 Nov;27(11):820–30.
- 524 23. Langsted A, Freiberg JJ, Nordestgaard BG. Fasting and nonfasting lipid levels:  
525 influence of normal food intake on lipids, lipoproteins, apolipoproteins, and  
526 cardiovascular risk prediction. *Circulation.* 2008 Nov 11;118(20):2047–56.

- 527        24. Liu MM, Peng J, Cao YX, Guo YL, Wu NQ, Zhu CG, et al. The difference between  
528            fasting and non-fasting lipid measurements is not related to statin treatment.  
529            Ann Transl Med. 2021 Mar;9(5):386.
- 530        25. Zaharia OP, Strassburger K, Strom A, Bönhof GJ, Karusheva Y, Antoniou S, et al.  
531            Risk of diabetes-associated diseases in subgroups of patients with recent-onset  
532            diabetes: a 5-year follow-up study. Lancet Diabetes Endocrinol. 2019  
533            Sep;7(9):684–94.
- 534
- 535
- 536
- 537
- 538



539 **Figure legends**

540 **Figure 1. Experiment design and the molecular clusters displayed as both**  
541 **similarity matrices and patient network. (b,c)** Molecular clusters were generated by  
542 integrated multi-omics (lipidomics and peptidomics) data in both DCS (b) and GoDARTS  
543 (c), respectively. The similarity matrices were calculated based on Euclidean distances  
544 with parameters of K=20 (the number of shared neighbours of datapoint),  $\alpha=0.5$   
545 (hyperparameter) and T=20 (number of iterations). Each point in the similarity  
546 matrices represents patient-to-patient similarity, the higher the colour intensity, the  
547 more similar the patients. Boxed regions represent the potential clusters. The patient  
548 networks were generated based on unweighted adjacency matrices. The nodes  
549 represent the patients, edge thickness reflects the strength of similarity, the size of the  
550 node represents the betweenness. Nodes were coloured based on their cluster  
551 assignments. DCS= Hoorn Diabetes Care System. GoDARTS=Genetics of Diabetes Audit  
552 and Research in Tayside Scotland.

553

554 **Figure 2. (a,b,c) Clinical characteristics and molecular profiles of multi-omics**  
555 **clusters in both DCS and GoDARTS clusters. (d) The hazard ratio for time to**  
556 **insulin requirement across clusters.** Multi-omics clustering was done without  
557 separating the women and men. In each cohort, the statistical difference between  
558 cluster 1 and cluster 2 was determined by logistic regression with age, BMI and gender  
559 as covariates. Multi-analysed P-values were adjusted by the Benjamini-Hochberg  
560 procedure, and a false discovery rate (FDR)-adjusted P-value  $\leq 0.05$  was considered  
561 significant. **(a)** Distributions of nine clinical measurements at baseline in both DCS and  
562 GoDARTS cohorts for each cluster. \*:P-value $\leq 0.05$ . \*\*:P-value $\leq 0.01$ . \*\*\*:P-  
563 value $\leq 0.001$ . **(b)** Venn diagrams showing overlaps of significant (significantly different

564 between clusters) proteins (upper) or lipids (lower) across DCS and GoDARTS cohorts.  
565 (c) The relative concentration heatmaps of common significant proteins (upper) or  
566 lipids (lower) between DCS and GoDARTS cohorts. Concentrations of each feature were  
567 first converted into the log(concentration) and then normalized in order to investigate  
568 the relative expression level of each feature between different clusters (Row Z-score).  
569 Heatmap cells were coloured in red/green to represent the relative expression level  
570 (red=low, green=high). The federated database does not allow to download data from  
571 individual samples in order to protect the patient's identity. Each vertical line in the  
572 heatmap represents 5 different patients' mean values for each feature. y-labels were  
573 hidden for a better presentation. Fully labelled versions are available in Supplemental  
574 Figure 5. (d) X-axis, hazard ratio, y-axis, database. Cox model with correction of gender  
575 (left) or with corrections for gender, age and BMI (right). The number in the panel  
576 represents the hazards with 95% confidence intervals. Multi-omics cluster 1:1 and  
577 Multi-omics cluster 2:2. Cox model gives the hazard ratio for the second group relative  
578 to the first group. The hazard ratio is not significant if the 95% confidence interval  
579 includes 1. DBP= Diastolic Blood Pressure. SBP= Systolic Blood Pressure. HbA1C=  
580 Haemoglobin A1C. DCS= Hoorn Diabetes Care System. GoDARTS=Genetics of Diabetes  
581 Audit and Research in Tayside Scotland.

582

583 **Figure 3 (a)** Comparison of clustering in Slieker and Donnelly et al., 2021 versus  
584 clustering in the current study. The first number in each cell represents the number of  
585 individuals overlapping, the second number represents the hypergeometric overlap p-  
586 value. (b) Distributions of nine clinical measurements at baseline in both DCS and  
587 GoDARTS cohorts for multi-omics clusters and clinical clusters. CL1= multi-omics  
588 cluster #1. CL2= multi-omics cluster #2. MD= mild diabetes. MDH= mild diabetes with

589 high HDL. MOD= mild obesity-related diabetes. SIDDD= severely insulin deficient

590 diabetes. SIRD= severely insulin resistant diabetes. SBP=systolic blood pressure.

591 DBP=diastolic blood pressure. HbA1C=Hemoglobin A1C.

592

593

594

595

596

597

598

599

600

601

602

603

604

605

606

607

608

609

610

611

612

613

Figure 1

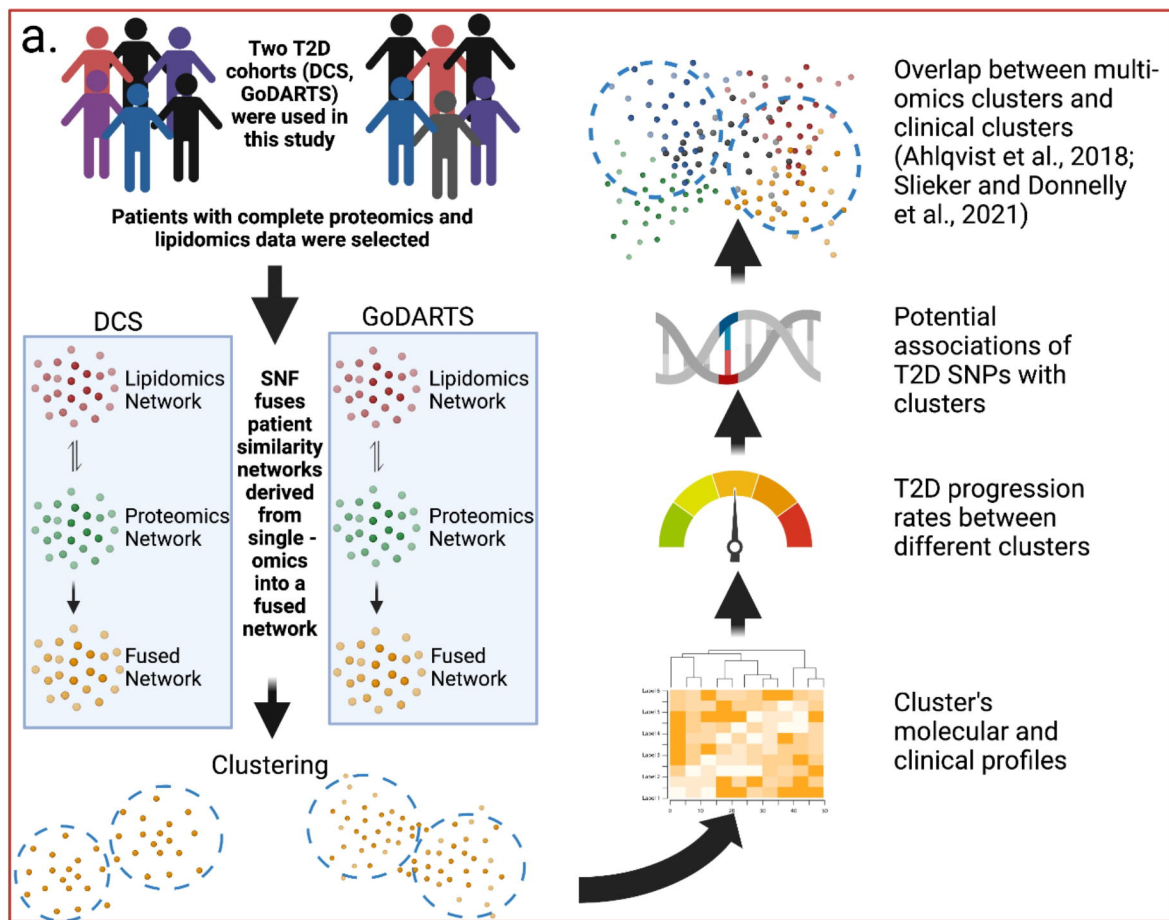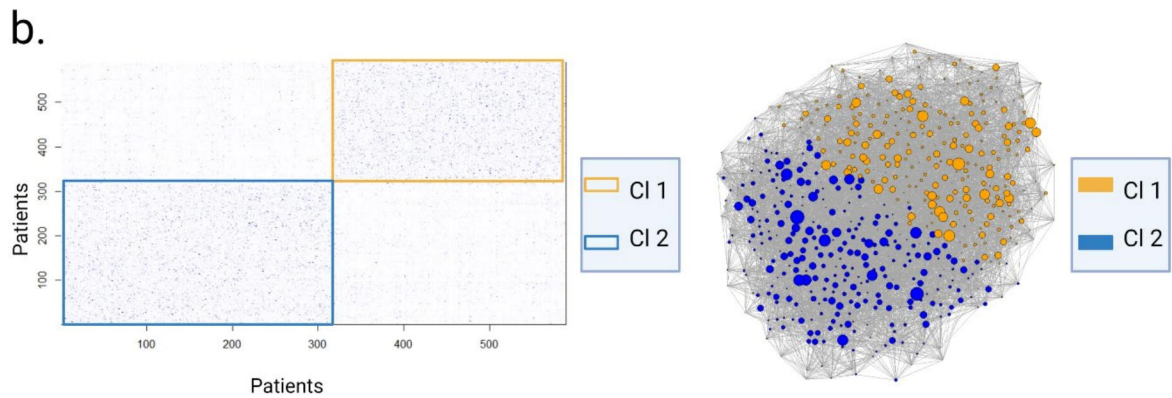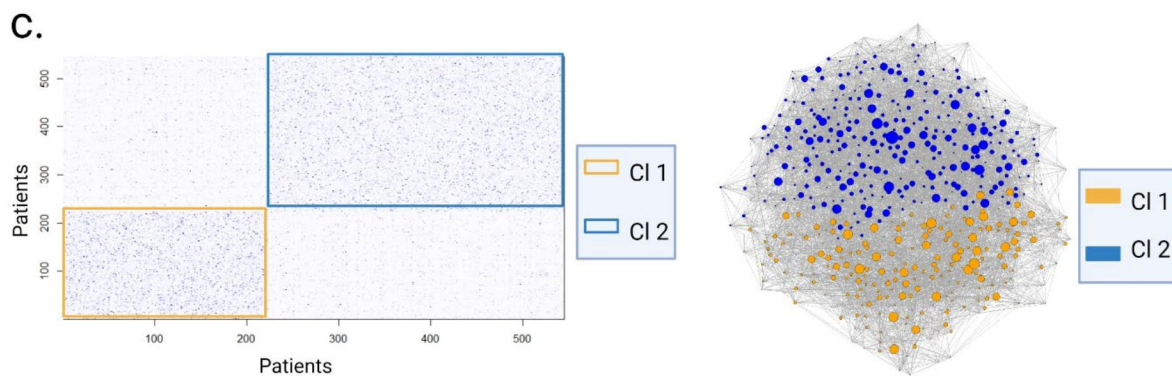

Figure 2

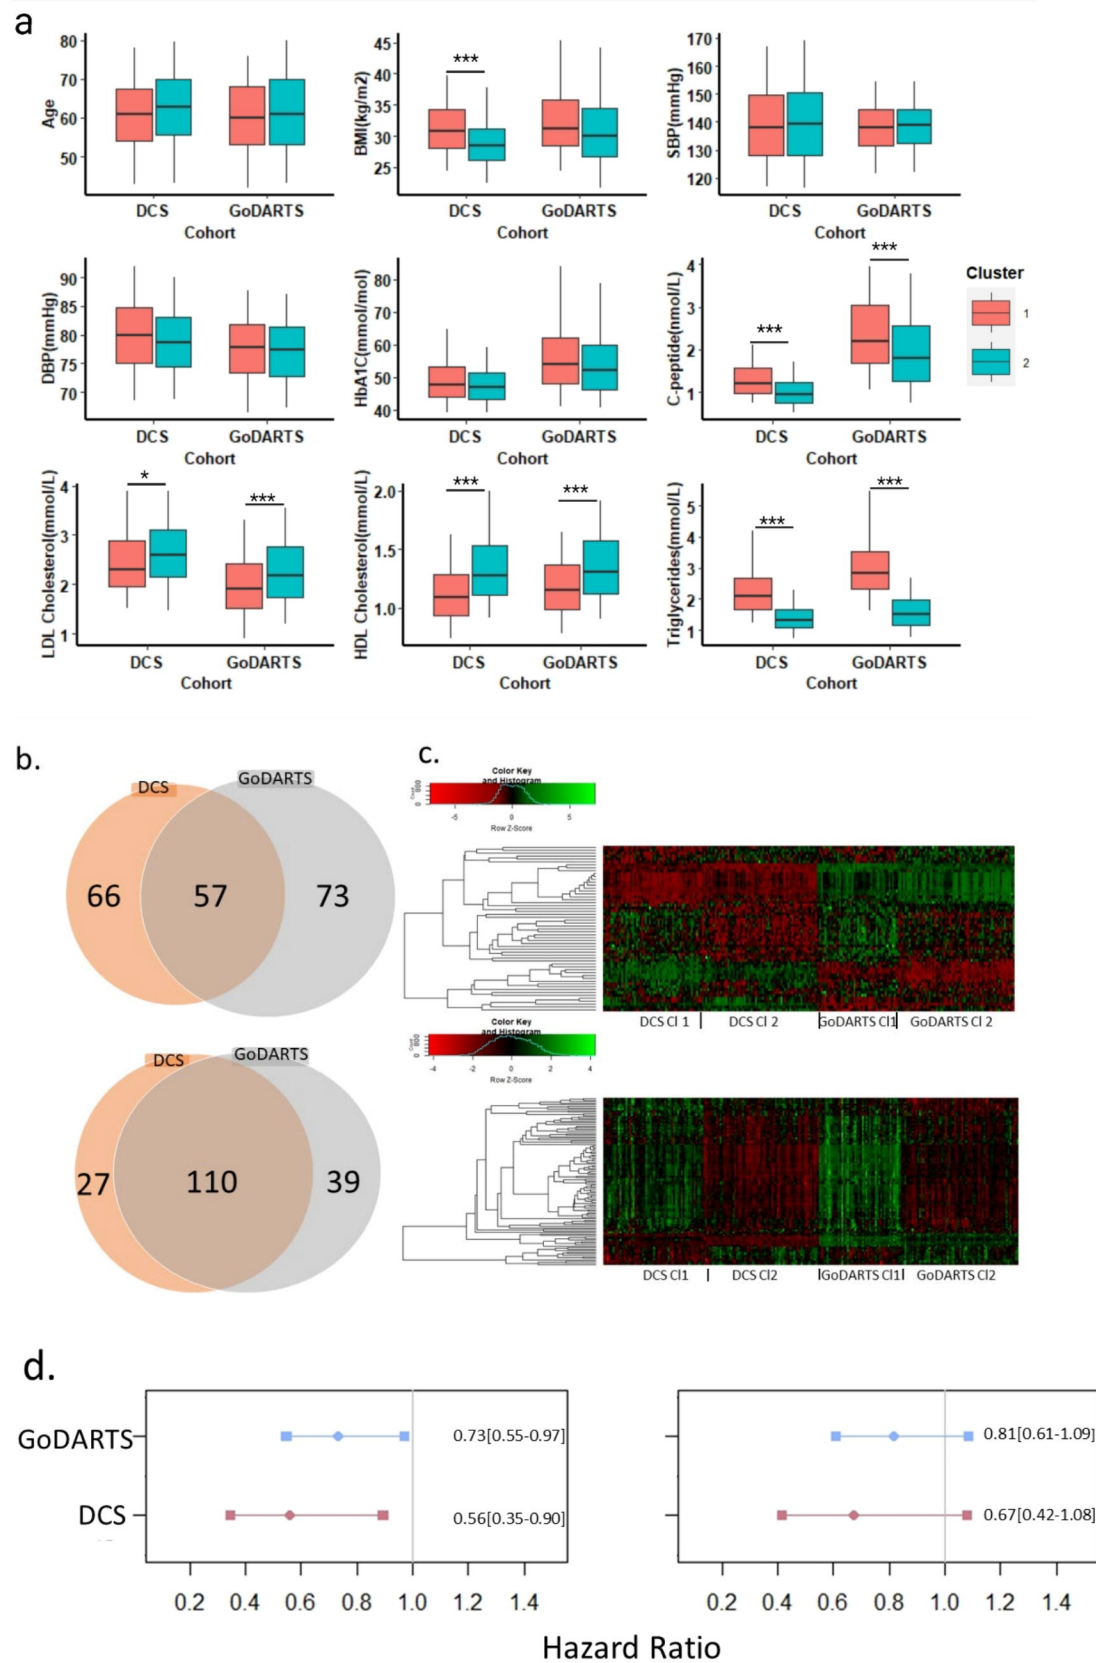

Figure 3

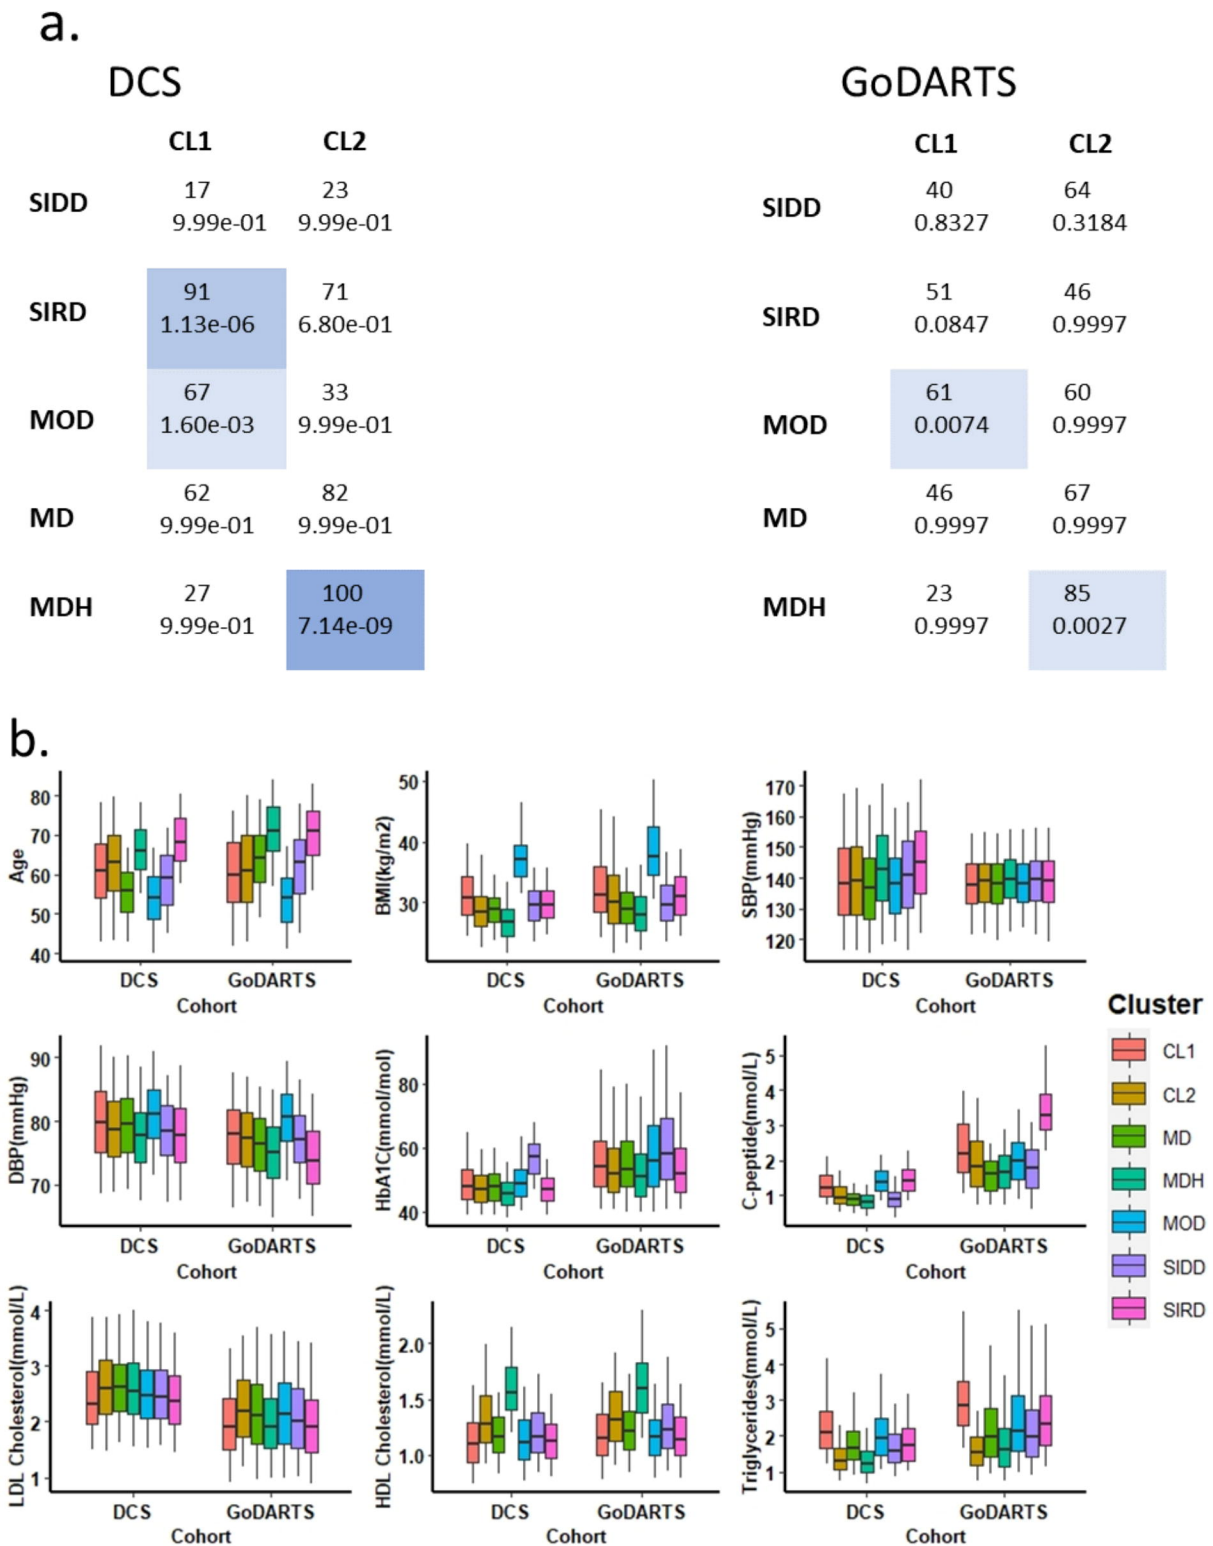

Source: https://medrxiv.org/content/10.1101/2022.09.03.22279563.full.pdf
